# Supplementary material for: The Functional Interplay between Protein Kinase CK2 and CCA1 Transcriptional Activity Is Essential for Clock Temperature Compensation in Arabidopsis
Source: PLOS journal article supplement (doi:10.1371/journal.pgen.1001201), 2010-11-04

Figure S8

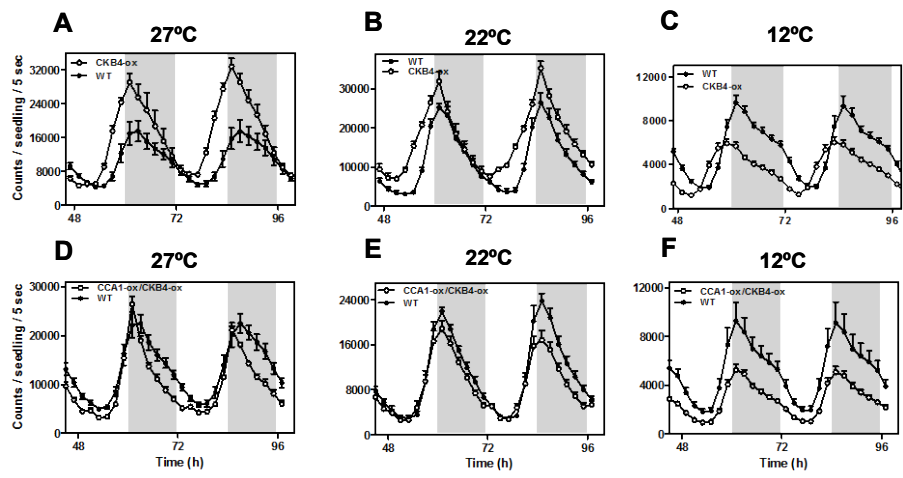

Supplement: S8 (10.1371/journal.pgen.1001201.s008) [file journal.pgen.1001201.s008]
